# Supplementary material
Source: Research Square preprint supplement (doi:10.21203/rs.3.rs-9204678/v1)
Supplement: Supplementary file 1 [file 7d935acc3e31fd06450d4df4.docx]

| **Program** | **Rank** | **Average Faculty H-index** | **Publication Averages** | | | | | | | |
| --- | --- | --- | --- | --- | --- | --- | --- | --- | --- | --- |
| Citations | Attention Score | News | Blogs | Patents | Facebook | Tweets | Wikipedia |
| Barrow Neurological Institute at St Joseph's Hospital and Medical Center | 1 | 25.13 | 266.52 | 39.45 | 8.19 | 1.81 | 4.13 | 3.66 | 19.57 | 0.56 |
| University of California (San Francisco) | 2 | 36.30 | 684.02 | 109.48 | 22.81 | 3.70 | 20.19 | 6.17 | 61.94 | 2.48 |
| Johns Hopkins University | 3 | 39.36 | 592.12 | 75.39 | 16.21 | 3.50 | 33.54 | 3.71 | 33.99 | 2.50 |
| Mayo Clinic College of Medicine and Science (Rochester) | 4 | 44.05 | 397.74 | 66.38 | 19.09 | 2.55 | 9.73 | 3.14 | 15.09 | 2.00 |
| University of Miami/Jackson Health System | 5 | 29.50 | 349.86 | 49.51 | 11.25 | 2.33 | 7.17 | 2.13 | 23.17 | 1.83 |
| University of Washington | 6 | 29.06 | 479.91 | 123.36 | 27.69 | 4.44 | 7.44 | 7.69 | 60.96 | 45.81 |
| UPMC Medical Education | 7 | 36.36 | 387.86 | 19.50 | 2.18 | 0.86 | 7.14 | 1.68 | 13.85 | 1.79 |
| NYU Grossman School of Medicine | 8 | 27.48 | 248.13 | 69.29 | 17.24 | 3.44 | 6.12 | 2.68 | 31.25 | 1.00 |
| New York Presbyterian Hospital (Columbia Campus) | 9 | 34.35 | 408.18 | 38.48 | 20.22 | 9.33 | 31.22 | 6.42 | 26.01 | 7.29 |
| University of Michigan | 10 | 24.58 | 432.28 | 136.75 | 67.23 | 23.20 | 11.00 | 15.17 | 93.62 | 6.93 |
| Washington University/B-JH/SLCH Consortium | 11 | 23.90 | 294.97 | 45.25 | 14.79 | 7.23 | 34.72 | 5.14 | 23.26 | 8.33 |
| University of Southern California/Los Angeles General Medical Center (USC/LA General) | 12 | 27.08 | 225.11 | 36.33 | 27.42 | 9.92 | 21.64 | 11.61 | 30.16 | 8.90 |
| Mass General Brigham/Massachusetts General Hospital | 13 | 35.44 | 742.14 | 100.70 | 16.74 | 4.89 | 41.59 | 4.78 | 72.27 | 3.56 |
| Emory University School of Medicine | 14 | 20.31 | 343.22 | 28.61 | 4.22 | 1.69 | 12.00 | 1.95 | 18.68 | 1.77 |
| Baylor College of Medicine | 15 | 30.27 | 336.33 | 38.94 | 19.22 | 5.00 | 15.55 | 5.95 | 32.68 | 47.93 |
| University of Utah Health | 16 | 26.48 | 407.02 | 24.80 | 15.50 | 6.50 | 45.67 | 6.07 | 30.41 | 8.97 |
| Mass General Brigham/Brigham and Women's Hospital/Children's Hospital | 17 | 36.04 | 574.82 | 85.02 | 15.27 | 3.59 | 31.31 | 4.53 | 59.41 | 2.86 |
| Cleveland Clinic Foundation | 18 | 25.33 | 268.50 | 31.76 | 6.03 | 1.53 | 4.70 | 1.70 | 18.67 | 0.83 |
| UCLA David Geffen School of Medicine/UCLA Medical Center | 19 | 34.04 | 421.29 | 59.97 | 13.28 | 3.60 | 18.00 | 4.00 | 25.27 | 2.24 |
| Mayo Clinic College of Medicine and Science (Jacksonville) | 20 | 23.71 | 233.29 | 31.63 | 8.59 | 1.41 | 2.76 | 1.24 | 9.27 | 0.41 |
| University of Pennsylvania Health System | 21 | 26.46 | 388.21 | 88.14 | 18.49 | 2.67 | 21.97 | 3.69 | 50.38 | 2.69 |
| Duke University Hospital | 22 | 31.80 | 559.73 | 37.53 | 7.91 | 2.96 | 19.94 | 2.20 | 14.01 | 2.66 |
| New York Presbyterian Hospital (Cornell Campus) | 23 | 30.67 | 385.11 | 22.40 | 12.46 | 4.75 | 91.51 | 4.69 | 24.66 | 4.20 |
| Stanford Health Care-Sponsored Stanford University | 24 | 31.32 | 522.12 | 95.17 | 36.46 | 13.03 | 60.96 | 8.51 | 36.12 | 6.07 |
| University of Florida | 25 | 24.60 | 520.42 | 105.56 | 46.50 | 15.37 | 23.66 | 19.14 | 71.96 | 9.87 |

**Supplemental Table 1:** Rank, average faculty h-index, and publication averages by program.
